# Supplementary material for: Enzymatic Activity Is Not Required for Phospholipase D Mediated TNF-α Regulation and Myocardial Healing
Source: PubMed Central journal article supplement (PMC6281985; doi:10.3389/fphys.2018.01698), 2018-11-29

## Supplemental Data

### **Enzymatic activity is not required for phospholipase D mediated TNF- $\alpha$ regulation and myocardial healing**

M. Klier<sup>1</sup>, S. Goressen<sup>2</sup>, M. Urbahn<sup>1</sup>, D. Barbosa<sup>3</sup>, M. Ouwens<sup>3</sup>, M. Elvers<sup>1</sup>

## Supplemental Figure Legends

**S1: Lacking of PLD does not alter the formation of platelet-immune cell-aggregates.**

(A) Flow cytometric analysis of platelet-immune cell-aggregate formation 0, 24 und 72 hours post AMI in *Pld1*<sup>-/-</sup>/*Pld2*<sup>-/-</sup> mice vs. *wt*; Platelet – leukocyte-aggregate formation left, platelet – neutrophile – aggregate formation right (*Pld1*<sup>+/+</sup>/*Pld2*<sup>+/+</sup> n = 6; *Pld1*<sup>-/-</sup>/*Pld2*<sup>-/-</sup> n = 9).

**A**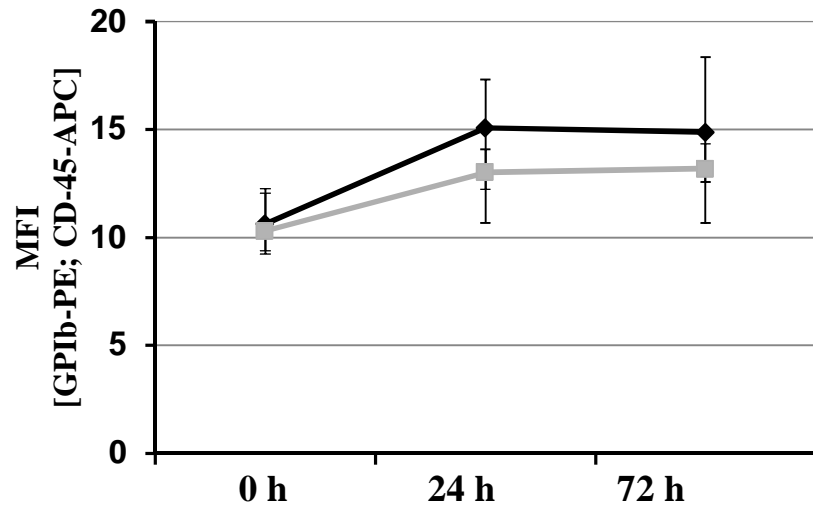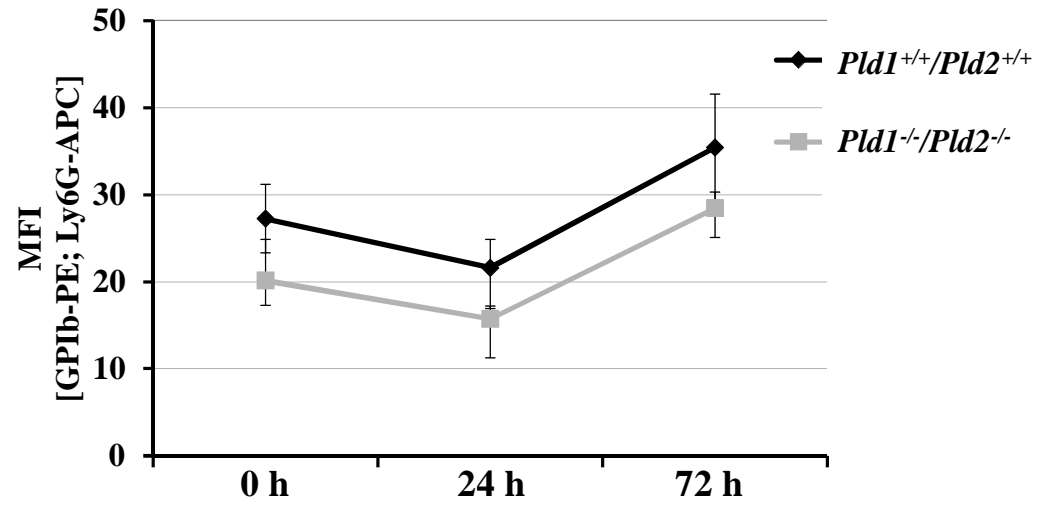

Supplement: Presentation_2.pdf [file Presentation_2.pdf]
